# Supplementary material for: Measurement Report: Urban Ammonia and Amines in Houston, Texas
Source: Copernicus journal article supplement (doi:10.5194/egusphere-2024-1230), 2024-05-07
Supplement: Supplementary file 1 [file egusphere-2024-1230-supplement.pdf]

1 Supporting Information  
2 **Urban Ammonia and Amines in Houston, Texas**

3  
4 Lee Tiszenkel<sup>1</sup>, James Flynn<sup>2</sup>, Shan-Hu Lee<sup>1\*</sup>

5  
6 <sup>1</sup> Department of Atmospheric and Earth Sciences, University of Alabama at Huntsville;  
7 Huntsville, Alabama, USA

8 <sup>2</sup> Department of Earth and Atmospheric Sciences, University of Houston; Houston, Texas, USA

9  
10 Corresponding author ([shanhu.lee@uah.edu](mailto:shanhu.lee@uah.edu))  
11

12 **Table S1.** CIMS sensitivities and detection limits for ammonia and amine measurements during  
13 this study in Houston. The sensitivities (Hz pptv<sup>-1</sup>) shown here are normalized for 1,000,000 Hz  
14 reagent ion signals. The detection limits are estimated using a 1-min integration time. In  
15 comparison, we also included those previously reported nearly 10 years earlier by You et al.[*You*  
16 *et al.*, 2014]

17

| <b>Compound</b> | <b>Sensitivity (Hz pptv<sup>-1</sup> MHz<sup>-1</sup>)</b> | <b>Detection limit (pptv)</b> | <b>Sensitivity[<i>You et al.</i>, 2014] (Hz pptv<sup>-1</sup> MHz<sup>-1</sup>)</b> | <b>Detection limit[<i>You et al.</i>, 2014] (pptv)</b> |
|-----------------|------------------------------------------------------------|-------------------------------|-------------------------------------------------------------------------------------|--------------------------------------------------------|
| Ammonia         | 13.1                                                       | 128.4                         | 13                                                                                  | 35                                                     |
| C1 amine        | 8.6                                                        | 0.4                           | 12                                                                                  | 0.1                                                    |
| C2 amine        | 2.6                                                        | 0.7                           | 12                                                                                  | 0.5                                                    |
| C3 amine        | 4.3                                                        | 1.2                           | 8                                                                                   | 0.8                                                    |
| C4 amine        | 2.3                                                        | 3.6                           | 4                                                                                   | 3.3                                                    |
| C5 amine        | 1.3                                                        | 2.7                           | 2                                                                                   | 1.9                                                    |
| C6 amine        | 1.3                                                        | 2.6                           | 2                                                                                   | 1.4                                                    |

18

19

20 **Table S2.** Relationships of the measured amines concentrations to ammonia derived from the  
21 combined observations in Houston reported by this study and Kent, OH reported by You et al[*You*  
22 *et al.*, 2014].  
23

| <b>Amine</b> | <b>Relationship to ammonia in pptv</b> |
|--------------|----------------------------------------|
| C1           | $1.1 \times 10^{-3} [\text{NH}_3]$     |
| C2           | $1.4 \times 10^{-3} [\text{NH}_3]$     |
| C3           | $8.4 \times 10^{-3} [\text{NH}_3]$     |
| C4           | No correlation                         |
| C5           | $1.9 \times 10^{-2} [\text{NH}_3]$     |
| C6           | $3.5 \times 10^{-3} [\text{NH}_3]$     |

24  
25

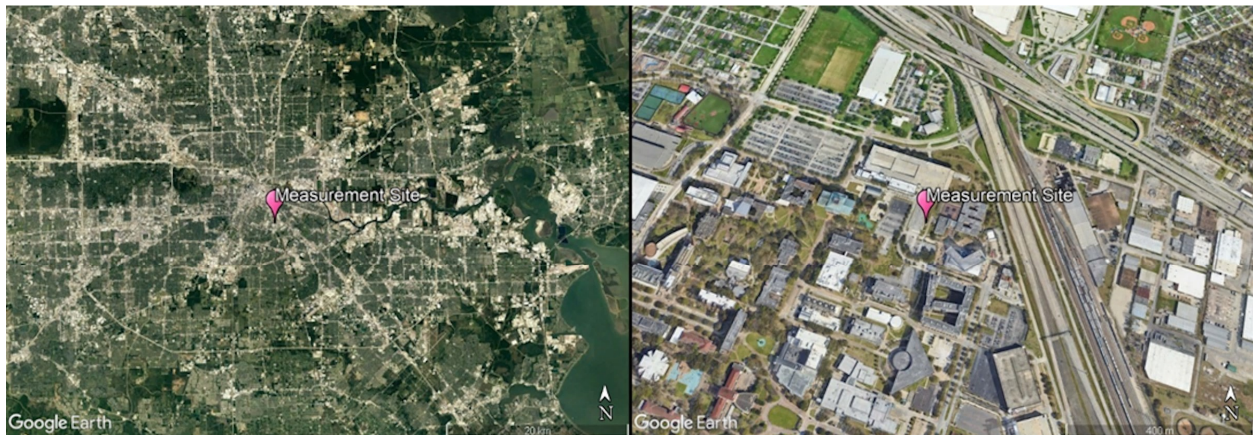

27

28 **Fig. S1.** (Left) Measurement site in the greater Houston urban area. The site was SE of the city  
29 center and located NW of Tranquility Bay. (Right) Satellite view of the nearby vicinity of the  
30 measurement site. The University of Houston campus is seen in the lower-left. The highways, train  
31 yard and industrial area are seen in the lower right. The upper right shows the nearby residential  
32 zone. Map credit: © Google Earth.

33

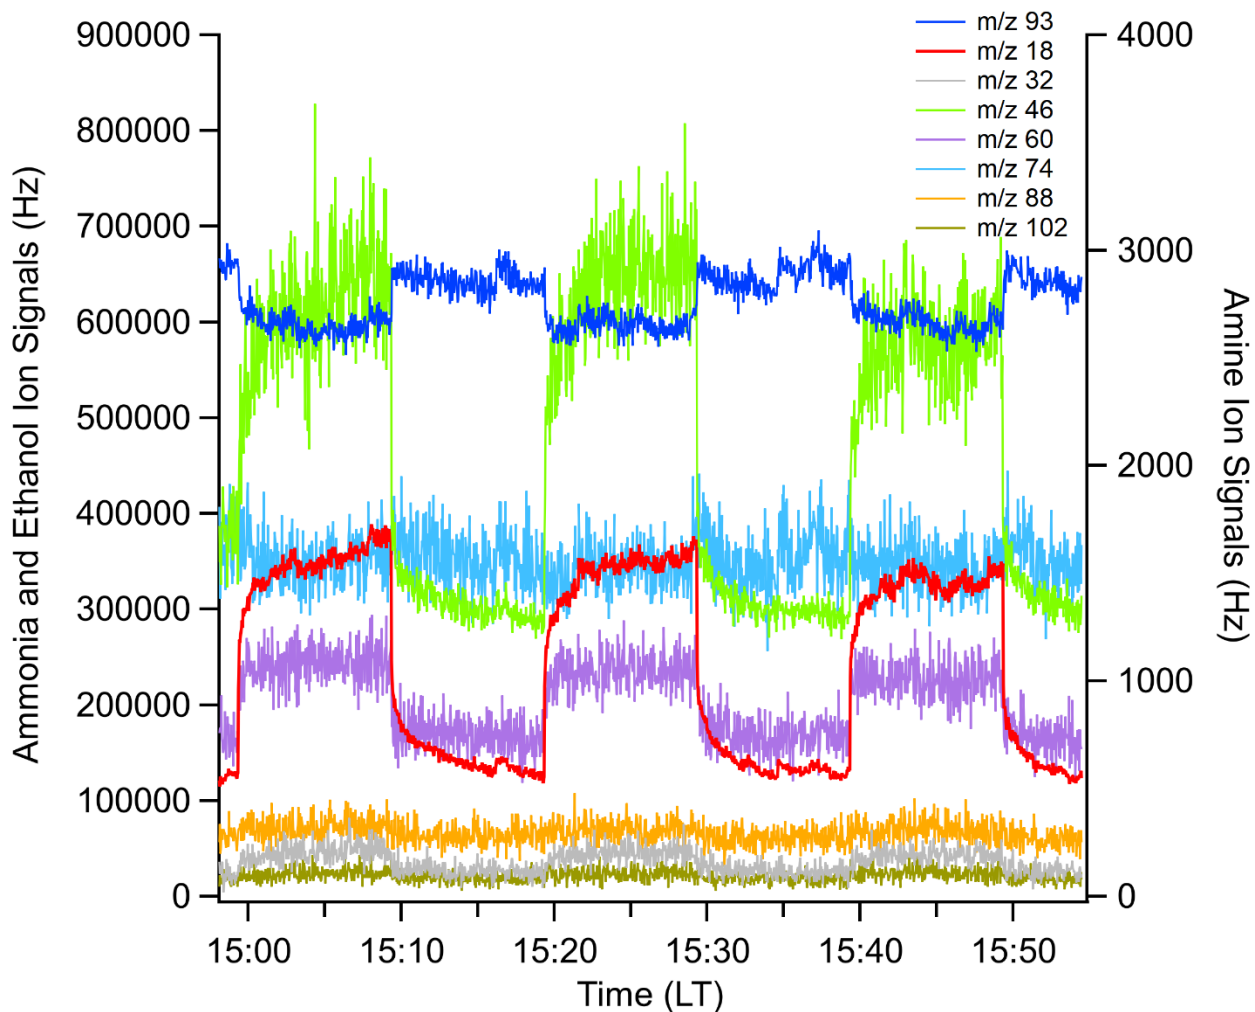

34  
 35  
 36  
 37  
 38  
 39  
 40  
 41

**Fig. S2.** A time series of the measurement/background cycle of the CIMS. This shows three switches of the inlet flow between ambient measurement and the phosphate scrubber. At 15:49, the flow was switched to background mode and the response of the  $\text{NH}_4^+$  signal (m/z 18) immediately drops. The  $\text{NH}_4^+$  signal continues to decrease after the drop, and the signal reaches an e-folded concentration within 28 seconds.

42

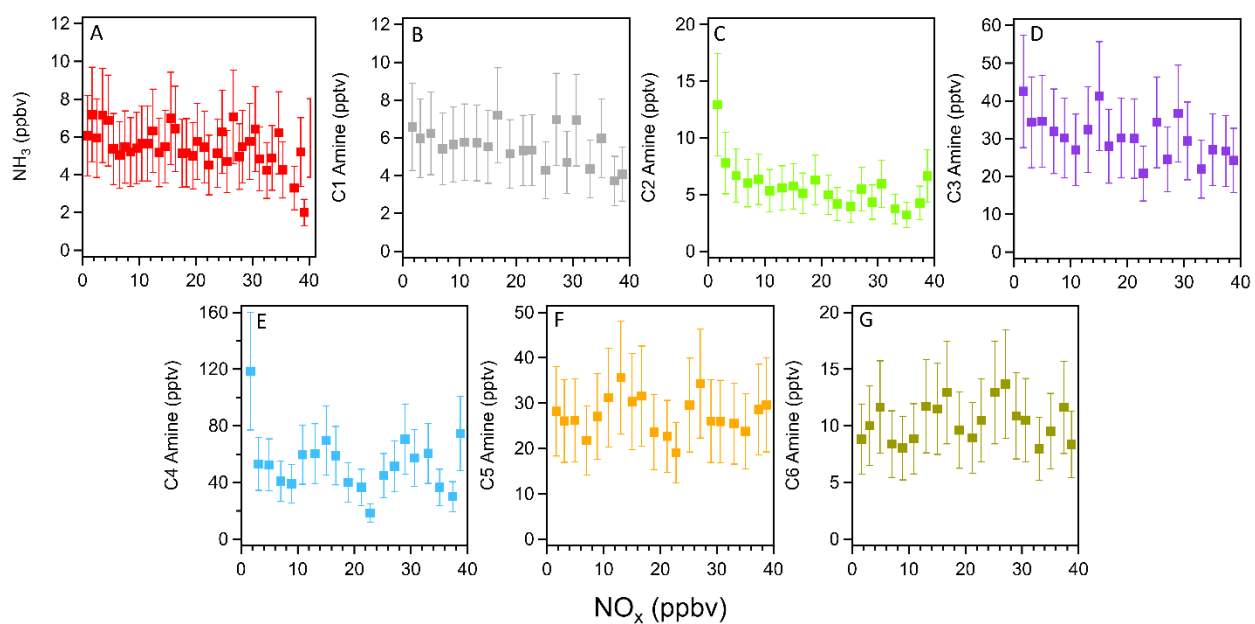

43

44

45 **Fig. S3.** Correlation between (a) ammonia and (b-g) C1-C6 amines with the collocated  $\text{NO}_x$   
46 concentrations during the measurement campaign. Vertical bars indicate one standard deviation  
47 from mean values of observation data.

48

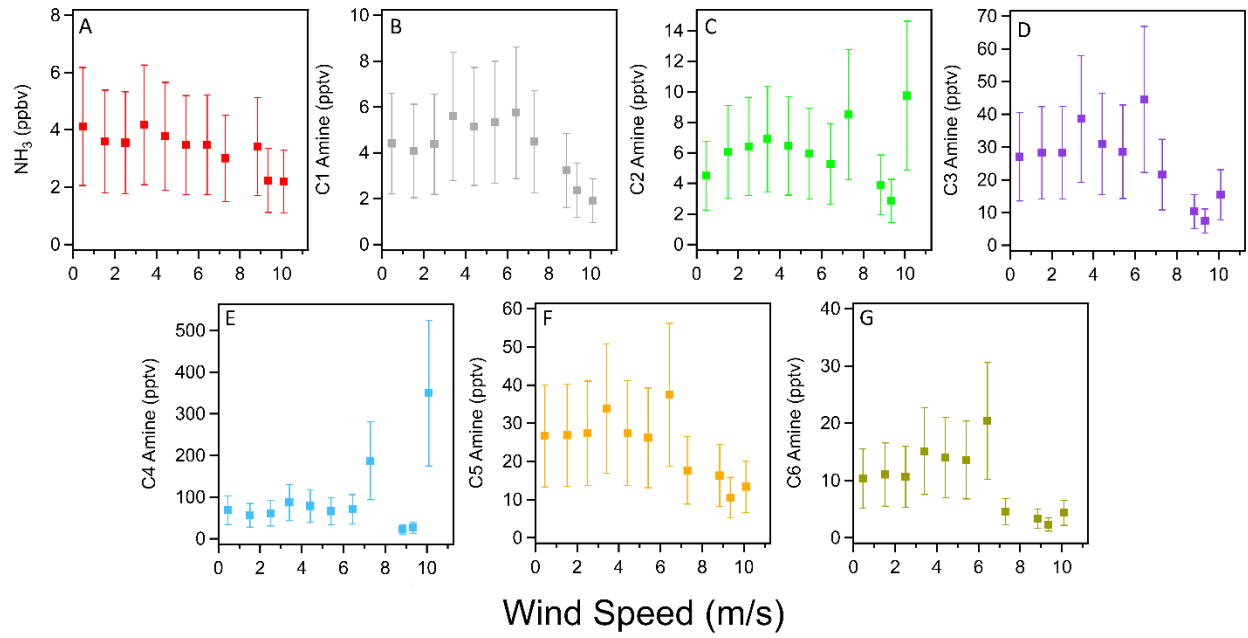

49  
 50  
 51  
 52  
 53

**Fig. S4.** Correlation of (a) ammonia and (b) C1-C6 amines with wind speed throughout the observation period.

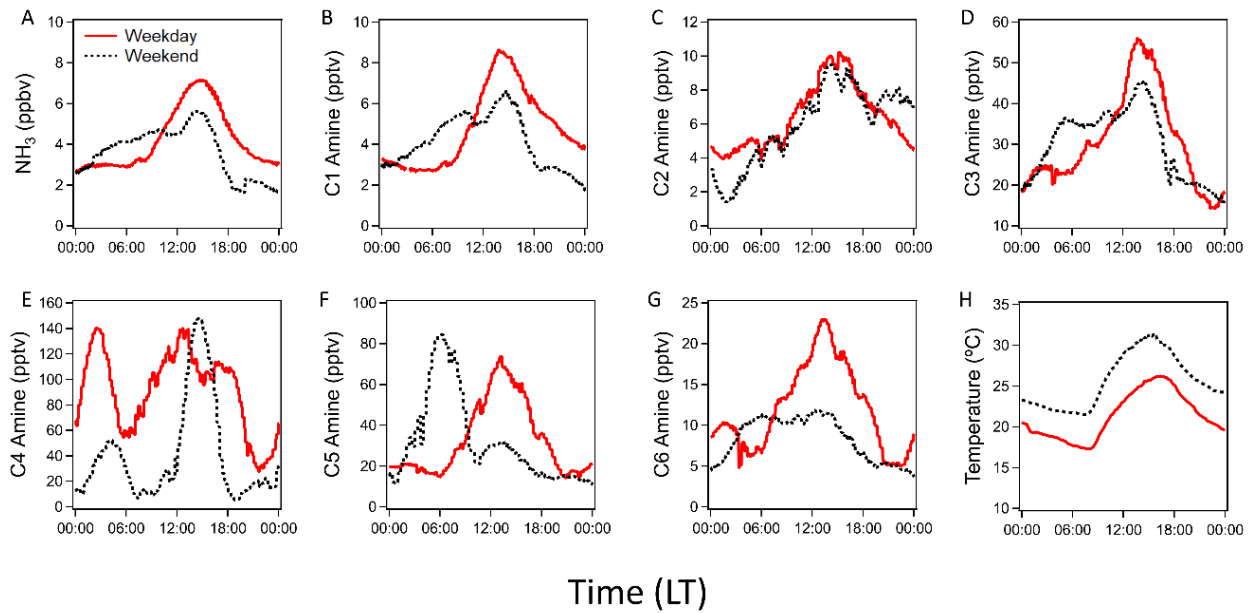

54  
 55 **Fig. S5.** Diurnal cycles of (a) ammonia, (b-g) amines, and (h) temperature on weekdays (solid red)  
 56 vs weekends (dashed black).  
 57



58

59 **References**

60 You, Y., et al. (2014), Atmospheric amines and ammonia measured with a Chemical Ionization  
61 Mass Spectrometer (CIMS), *Atmos. Chem. Phys.* , *14*, 12181-12194, doi:Doi: 10.5194/acpd-14-  
62 16411-2014.

63
